# Supplementary material for: Toxicokinetic Study of a Gastroprotective Dose of Capsaicin by HPLC-FLD Method
Source: MDPI journal article supplement (doi:10.3390/molecules24152848), 2019-08-05
Supplement: s1 [file s1]

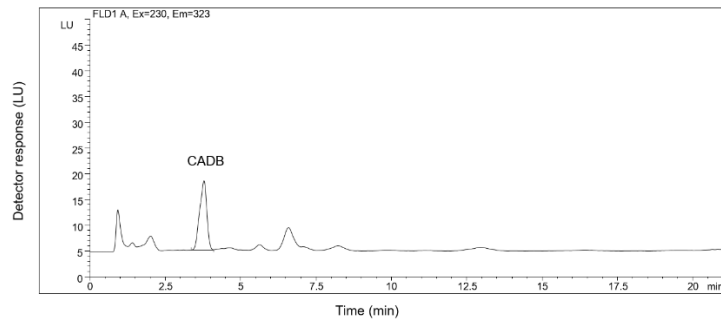

**Figure S1.** Chromatogram of the extract of the plasma of an experimental dog 0 min before *per os* administration of Capsaicin natural (USP 29, 0.9 mg/kg) test item, spiked with cyclohexanecarboxylic acid-3,4-dimethoxybenzylamide (CADB) as internal standard (IS) (c=20 ng/mL).

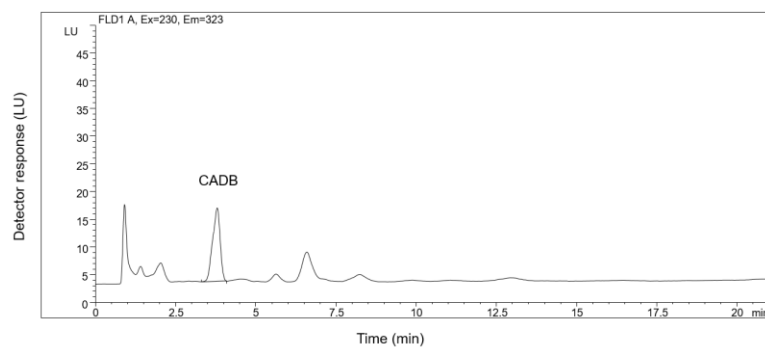

**Figure S2.** Chromatogram of the extract of the plasma of an experimental dog 15 min after *per os* administration of Capsaicin natural (USP 29, 0.9 mg/kg) test item, spiked with cyclohexanecarboxylic acid-3,4-dimethoxybenzylamide (CADB) as internal standard (IS) (c=20 ng/mL).

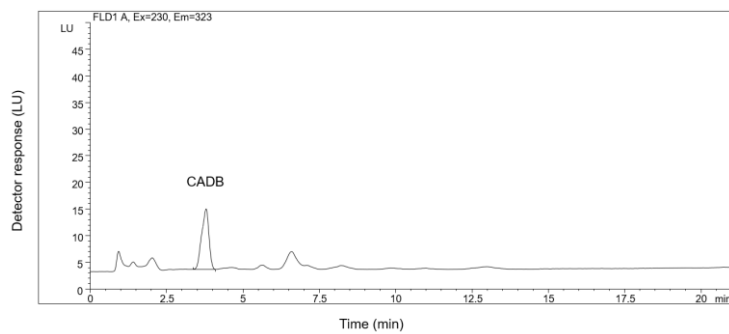

**Figure S3.** Chromatogram of the extract of the plasma of an experimental dog 30 min after *per os* administration of Capsaicin natural (USP 29, 0.9 mg/kg) test item, spiked with cyclohexanecarboxylic acid-3,4-dimethoxybenzylamide (CADB) as internal standard (IS) (c=20 ng/mL).

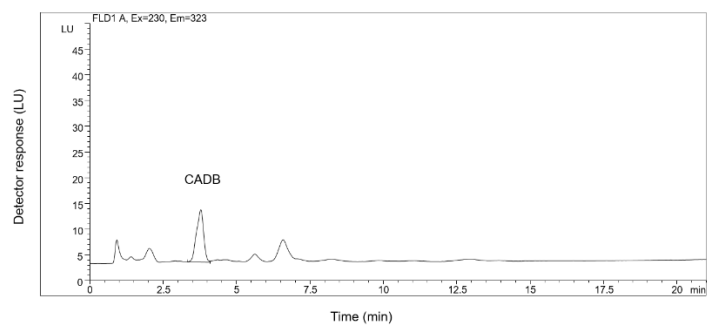

**Figure S4.** Chromatogram of the extract of the plasma of an experimental dog 60 min after *per os* administration of Capsaicin natural (USP 29, 0.9 mg/kg) test item, spiked with cyclohexanecarboxylic acid-3,4-dimethoxybenzylamide (CADB) as internal standard (IS) (c=20 ng/mL).

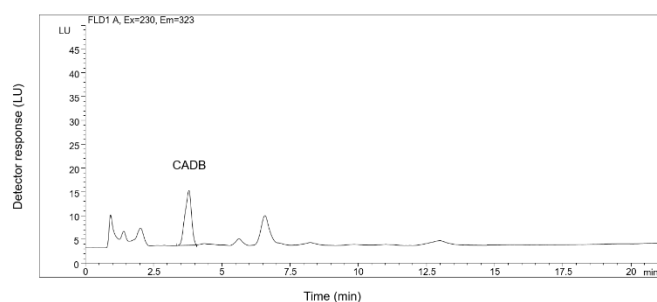

**Figure S5.** Chromatogram of the extract of the plasma of an experimental dog 120 min after *per os* administration of Capsaicin natural (USP 29, 0.9 mg/kg) test item, spiked with cyclohexanecarboxylic acid-3,4-dimethoxybenzylamide (CADB) as internal standard (IS) (c=20 ng/mL).

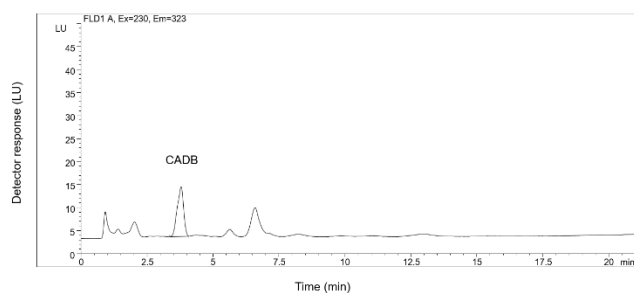

**Figure S6.** Chromatogram of the extract of the plasma of an experimental dog 180 min after *per os* administration of Capsaicin natural (USP 29, 0.9 mg/kg) test item, spiked with cyclohexanecarboxylic acid-3,4-dimethoxybenzylamide (CADB) as internal standard (IS) (c=20 ng/mL).

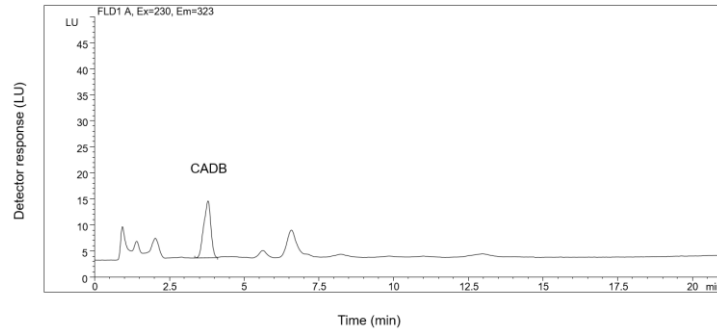

**Figure S7.** Chromatogram of the extract of the plasma of an experimental dog 240 min after *per os* administration of Capsaicin natural (USP 29, 0.9 mg/kg) test item, spiked with cyclohexanecarboxylic acid-3,4-dimethoxybenzylamide (CADB) as internal standard (IS) (c=20 ng/mL).

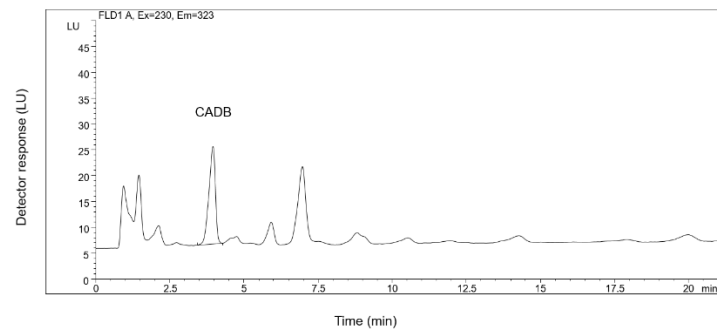

**Figure S8.** Chromatogram of the extract of the plasma of an experimental dog 0 min before *per os* administration of Capsaicin natural (USP 29, 4.8 mg/kg) test item, spiked with cyclohexanecarboxylic acid-3,4-dimethoxybenzylamide (CADB) as internal standard (IS) (c=20 ng/mL).

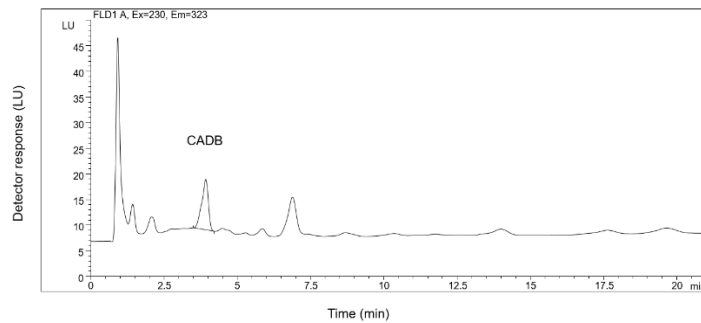

**Figure S9.** Chromatogram of the extract of the plasma of an experimental dog 120 min after *per os* administration of Capsaicin natural (USP 29, 4.8 mg/kg) test item, spiked with cyclohexanecarboxylic acid-3,4-dimethoxybenzylamide (CADB) as internal standard (IS) (c=20 ng/mL).
